# Supplementary material for: Integration of molecules and new fossils supports a Triassic origin for Lepidosauria (lizards, snakes, and tuatara)
Source: PubMed Central journal article supplement (PMC4016551; doi:10.1186/1471-2148-13-208), 2013-09-25

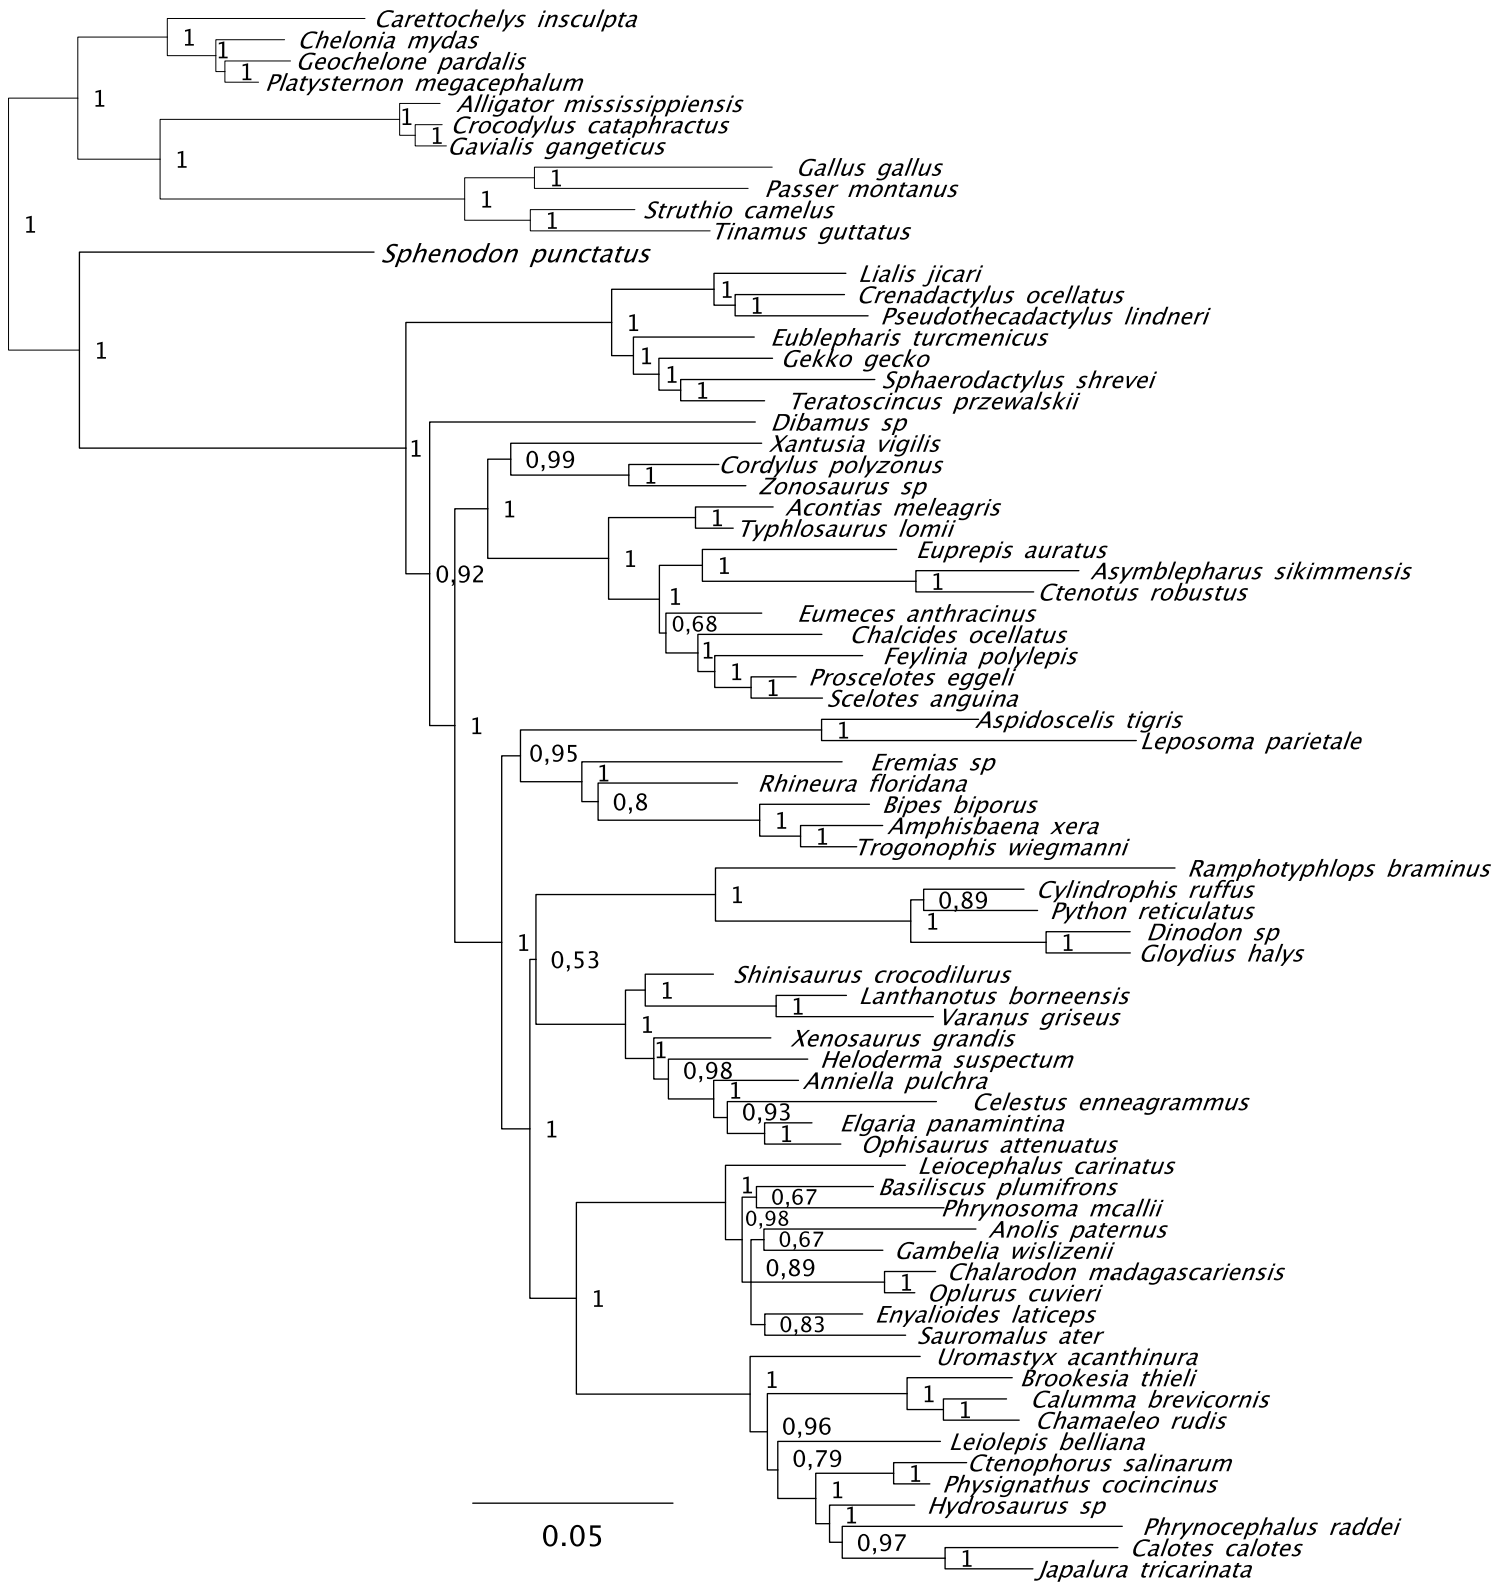

Supplement: 1471-2148-13-208-S5.pdf [file 1471-2148-13-208-S5.pdf]
